# Supplementary material for: A theoretical study of the rearrangement processes of energized CCCB and CCCAl
Source: Royal Society of Chemistry journal article supplement (doi:10.1039/b906345e), 2009-01-01
Supplement: b906345e.pdf [file b906345e.pdf]

## Supplementary data

### A theoretical study of the rearrangement processes of energized CCCB and CCCAl.

Tianfang Wang and John H. Bowie\*

Department of Chemistry, The University of Adelaide, South Australia, 5005

\* Corresponding author. e-mail: [john.bowie@adelaide.edu.au](mailto:john.bowie@adelaide.edu.au)

Tables 3-7 contain data concerning the geometries [UB3LYP/6-311+G(3df) level of theory] and single point energies [calculated at UCCSD(T)/aug-cc-pVTZ] of all minima and transition states shown in the appropriate Figures in the text. Energies (in hartree and  $\text{kJ mol}^{-1}$ ) at the lower UCCSD(T)/aug-cc-pVDZ//UB3LYP/6-31+G(d) level of theory are indicated in parenthesis for comparison purposes. Geometric data are not included at this level of theory. Tables 8-9 contain data concerning the geometries [UX3LYP/cc-pVTZ or UBMK/cc-pVTZ levels of theory] and single point energies [calculated at UCCSD(T)/aug-cc-pVTZ] of selected minima. Relative energies obtained by subtraction of corrected hartree energies are recorded in  $\text{kJ mol}^{-1}$  units in all tables. Standard enthalpies of formation [UCCSD(T)/aug-cc-pVTZ//UB3LYP/6-311+G(3df) level] are contained in Table 10, and charge distributions of selected  $\text{C}_3\text{B}$  and  $\text{C}_3\text{Al}$  isomers are contained in Table 11 and 12.

**Table 3. Minima and Transition Structures on the Quartet C<sub>3</sub>B Surface Calculated at the UB3LYP/6-311+G(3df) Level of Theory, with Single Point Energies (Including Zero-Point Energy Correction) Calculated at UCCSD(T)/aug-cc-pVTZ**

|                                                           | <sup>4</sup> A                          | TS <sup>4</sup> A/ <sup>4</sup> D | <sup>4</sup> D             | TS <sup>4</sup> D/ <sup>4</sup> H | <sup>4</sup> H             | TS <sup>4</sup> A/ <sup>4</sup> G | TS <sup>4</sup> H/ <sup>4</sup> G | <sup>4</sup> G             | TS <sup>4</sup> H/ <sup>4</sup> B | TS <sup>4</sup> G/ <sup>4</sup> B | <sup>4</sup> B             |
|-----------------------------------------------------------|-----------------------------------------|-----------------------------------|----------------------------|-----------------------------------|----------------------------|-----------------------------------|-----------------------------------|----------------------------|-----------------------------------|-----------------------------------|----------------------------|
| State                                                     | <sup>4</sup> Σ                          | <sup>4</sup> A                    | <sup>4</sup> A''           | <sup>4</sup> A''                  | <sup>4</sup> A''           | <sup>4</sup> A''                  | <sup>4</sup> A                    | <sup>4</sup> A''           | <sup>4</sup> A''                  | <sup>4</sup> A''                  | <sup>4</sup> A             |
| Symmetry                                                  | C <sub>∞v</sub>                         | C <sub>1</sub>                    | C <sub>s</sub>             | C <sub>s</sub>                    | C <sub>s</sub>             | C <sub>s</sub>                    | C <sub>1</sub>                    | C <sub>2v</sub>            | C <sub>s</sub>                    | C <sub>s</sub>                    | C <sub>∞v</sub>            |
| Energy (Hartree)                                          | -138.55013<br>(-138.44884) <sup>a</sup> | -138.51650<br>(-138.41617)        | -138.51885<br>(-138.41808) | -138.51807<br>(-138.41732)        | -138.53817<br>(-138.43526) | -138.49098<br>(-138.39043)        | -138.50209<br>(-138.40399)        | -138.51868<br>(-138.41549) | -138.47976<br>(-138.38057)        | -138.45362<br>(-138.35582)        | -138.51861<br>(-138.42170) |
| Energy Relative to <sup>4</sup> A (kJ mol <sup>-1</sup> ) | 0                                       | 88.3<br>(85.7)                    | 82.0<br>(80.7)             | 84.1<br>(82.8)                    | 31.4<br>(35.5)             | 155.2<br>(153.0)                  | 126.0<br>(117.5)                  | 81.5<br>(87.4)             | 184.7<br>(178.9)                  | 253.5<br>(244.1)                  | 82.8<br>(71.1)             |
| Dipole Moment (Debye)                                     | 3.9473                                  | 3.2388                            | 2.5327                     | 1.5085                            | 0.1897                     | 1.9949                            | 0.3350                            | 0.0986                     | 2.2269                            | 3.1030                            | 4.2137                     |
| Bond Lengths (Å)                                          |                                         |                                   |                            |                                   |                            |                                   |                                   |                            |                                   |                                   |                            |
| C1C2                                                      | 1.301                                   | 1.319                             | 1.324                      | 1.312                             | 1.355                      | 1.302                             | 1.438                             | 1.374                      | 2.170                             | 1.299                             |                            |
| C2C3                                                      | 1.283                                   | 1.330                             | 1.347                      | 1.358                             | 1.355                      | 1.485                             | 1.316                             | 1.374                      | 1.303                             | 2.050                             | 1.278                      |
| C3B                                                       | 1.380                                   | 1.397                             | 1.412                      | 1.443                             | 1.517                      | 1.436                             | 1.616                             | 1.501                      | 1.428                             | 1.391                             |                            |
| C1C3                                                      |                                         |                                   |                            |                                   |                            | 1.920                             |                                   | 1.476                      |                                   | 3.081                             |                            |
| C1B                                                       |                                         |                                   |                            | 2.187                             | 1.518                      |                                   | 1.458                             |                            | 1.420                             |                                   | 1.418                      |
| C2B                                                       |                                         | 1.924                             | 1.711                      | 1.653                             | 1.589                      | 1.549                             |                                   |                            | 1.676                             | 1.439                             | 1.385                      |
| Bond Angles (°)                                           |                                         |                                   |                            |                                   |                            |                                   |                                   |                            |                                   |                                   |                            |
| C1C2C3                                                    | 180.0                                   | 179.8                             | 176.8                      | 150.6                             | 122.9                      | 86.8                              | 102.5                             | 64.9                       |                                   | 132.6                             |                            |
| C1C3C2                                                    |                                         |                                   |                            |                                   |                            | 42.6                              |                                   | 57.5                       |                                   | 18.1                              |                            |
| C1C2B                                                     |                                         | 133.6                             | 129.8                      | 94.4                              | 61.5                       |                                   |                                   |                            | 40.9                              | 18.1                              |                            |
| C1BC2                                                     |                                         |                                   |                            | 36.7                              | 51.7                       |                                   |                                   |                            | 88.6                              |                                   | 180.0                      |
| C1C3B                                                     |                                         |                                   |                            |                                   |                            |                                   |                                   | 60.6                       |                                   |                                   |                            |
| C1BC3                                                     |                                         |                                   |                            |                                   | 103.3                      |                                   | 88.5                              | 58.9                       |                                   |                                   |                            |
| C2C1C3                                                    |                                         |                                   |                            |                                   |                            | 50.6                              |                                   |                            |                                   | 29.3                              |                            |
| C2C1B                                                     |                                         |                                   |                            | 48.9                              | 66.9                       |                                   | 79.2                              | 118.1                      | 50.6                              |                                   |                            |
| C2C3B                                                     | 180.0                                   | 89.7                              | 76.6                       | 72.3                              | 66.9                       | 64.0                              | 77.3                              |                            | 75.5                              | 44.5                              |                            |
| C2BC3                                                     |                                         | 43.7                              | 50.0                       | 51.5                              | 51.7                       | 59.5                              |                                   |                            | 48.9                              | 92.8                              |                            |
| C3C2B                                                     |                                         | 46.6                              | 53.4                       | 56.3                              | 61.4                       | 56.5                              |                                   |                            |                                   | 42.7                              | 180.0                      |
| Dihedral Angles (°)                                       |                                         |                                   |                            |                                   |                            |                                   |                                   |                            |                                   |                                   |                            |
| BC3C2C1                                                   | —                                       | 180.0                             | 180.0                      | 0.0                               | 0.0                        | 180.0                             | 26.9                              | 180.0                      | 0.0                               | 180.0                             | —                          |
| C1C2BC3                                                   | —                                       | 180.0                             | 180.0                      | 180.0                             | 180.0                      | 0.0                               | -145.3                            | 0.0                        | 180.0                             | 0.0                               | —                          |

<sup>a</sup> Energy data in parentheses are calculated at CCSD(T)/aug-cc-pVDZ//B3LYP/6-31+G(d) level of theory.

**Table 4. Minima and Transition Structures on the Doublet C<sub>3</sub>B Surface Calculated at the UB3LYP/6-311+G(3df) Level of Theory, with Single Point Energies (Including Zero-Point Energy Correction) Calculated at UCCSD(T)/aug-cc-pVTZ**

|                                                               | <sup>2</sup> A                          | TS <sup>2</sup> A/ <sup>2</sup> H | <sup>2</sup> H             | TS <sup>2</sup> A/ <sup>2</sup> G | TS <sup>2</sup> H/ <sup>2</sup> G | <sup>2</sup> G             | TS <sup>2</sup> H/ <sup>2</sup> B | TS <sup>2</sup> G/ <sup>2</sup> B | <sup>2</sup> B             |   |
|---------------------------------------------------------------|-----------------------------------------|-----------------------------------|----------------------------|-----------------------------------|-----------------------------------|----------------------------|-----------------------------------|-----------------------------------|----------------------------|---|
| <b>State</b>                                                  | <sup>2</sup> A                          | <sup>2</sup> A                    | <sup>2</sup> A             | <sup>2</sup> A'                   | <sup>2</sup> A'                   | <sup>2</sup> A             | <sup>2</sup> A'                   | <sup>2</sup> A                    | <sup>2</sup> A''           | — |
| <b>Symmetry</b>                                               | C <sub>1</sub>                          | C <sub>1</sub>                    | C <sub>s</sub>             | C <sub>s</sub>                    | C <sub>1</sub>                    | C <sub>s</sub>             | C <sub>1</sub>                    | C <sub>s</sub>                    | C <sub>∞v</sub>            |   |
| <b>Energy (Hartree)</b>                                       | -138.53113<br>(-138.43637) <sup>a</sup> | -138.51075<br>(-138.41421)        | -138.55423<br>(-138.45111) | -138.49458<br>(-138.39310)        | -138.51962<br>(-138.41518)        | -138.56890<br>(-138.46675) | -138.50505<br>(-138.40882)        | -138.48675<br>(-138.38023)        | -138.51565<br>(-138.41846) |   |
| <b>Energy Relative to <sup>2</sup>A (kJ mol<sup>-1</sup>)</b> | 0                                       | 53.5<br>(58.1)                    | -60.7<br>(-38.5)           | 95.8<br>(113.7)                   | 30.1<br>(55.6)                    | -99.2<br>(-79.8)           | 68.6<br>(72.3)                    | 116.3<br>(147.1)                  | 40.6<br>(46.8)             |   |
| <b>Dipole Moment (Debye)</b>                                  | 1.3307                                  | 1.7131                            | 0.5529                     | 1.0750                            | 1.0679                            | 2.4172                     | 0.8293                            | 2.5651                            | 1.6581                     |   |
| <b>Bond Lengths (Å)</b>                                       |                                         |                                   |                            |                                   |                                   |                            |                                   |                                   |                            |   |
| C1C2                                                          | 1.316                                   | 1.324                             | 1.361                      | 1.349                             | 1.318                             | 1.435                      |                                   | 1.717                             |                            |   |
| C2C3                                                          | 1.268                                   | 1.312                             | 1.361                      | 1.364                             | 1.491                             | 1.435                      | 1.274                             | 1.310                             | 1.284                      |   |
| C3B                                                           | 1.503                                   | 1.603                             | 1.574                      | 1.564                             | 1.533                             | 1.482                      | 1.516                             |                                   |                            |   |
| C1C3                                                          |                                         |                                   |                            | 1.435                             | 1.492                             |                            |                                   | 2.886                             |                            |   |
| C1B                                                           |                                         | 2.331                             | 1.575                      | 2.748                             | 1.527                             | 1.482                      | 1.518                             | 1.443                             | 1.503                      |   |
| C2B                                                           |                                         | 2.008                             | 1.519                      |                                   |                                   |                            | 1.517                             | 1.426                             | 1.377                      |   |
| <b>Bond Angles (°)</b>                                        |                                         |                                   |                            |                                   |                                   |                            |                                   |                                   |                            |   |
| C1C2C3                                                        | 174.2                                   | 138.4                             | 132.0                      | 63.9                              | 92.4                              | 62.6                       |                                   | 144.5                             |                            |   |
| C1C3C2                                                        |                                         |                                   |                            | 57.6                              | 40.4                              | 58.7                       |                                   | 20.2                              |                            |   |
| C1C2B                                                         |                                         | 86.2                              | 66.0                       |                                   | 50.1                              |                            |                                   | 53.7                              |                            |   |
| C1BC2                                                         |                                         | 34.5                              | 52.2                       |                                   | 41.5                              |                            | 155.2                             | 73.5                              | 180.0                      |   |
| C1C3B                                                         |                                         |                                   |                            | 132.7                             | 48.3                              | 59.8                       |                                   |                                   |                            |   |
| C1BC3                                                         |                                         |                                   | 104.3                      | 22.6                              | 83.1                              | 60.4                       | 155.1                             |                                   |                            |   |
| C2C1C3                                                        |                                         |                                   |                            |                                   | 47.2                              | 58.7                       |                                   | 15.3                              |                            |   |
| C2C1B                                                         |                                         | 59.3                              |                            |                                   | 88.4                              | 118.5                      |                                   | 52.85                             |                            |   |
| C2C3B                                                         | 150.7                                   | 86.5                              |                            | 169.7                             | 82.3                              |                            | 65.2                              |                                   |                            |   |
| C2BC3                                                         |                                         | 40.7                              |                            |                                   | 47.9                              |                            | 49.7                              |                                   |                            |   |
| C3C2B                                                         |                                         | 52.8                              |                            |                                   | 49.8                              |                            | 65.1                              | 161.8                             | 180.0                      |   |
| <b>Dihedral Angles (°)</b>                                    |                                         |                                   |                            |                                   |                                   |                            |                                   |                                   |                            |   |
| BC3C2C1                                                       | 180.0                                   | 11.8                              | 0.0                        | 180.0                             | 28.9                              | 0.0                        | 0.0                               | 180.0                             | —                          |   |
| C1C2BC3                                                       | 180.0                                   | -172.2                            | 180.0                      | 0.0                               | -141.0                            | 180.0                      | 180.0                             | 180.0                             | —                          |   |

<sup>a</sup> Energy data in parentheses are calculated at CCSD(T)/aug-cc-pVDZ//B3LYP/6-31+G(d) level of theory.

**Table 5. Minima and Transition Structures on the Doublet C<sub>3</sub>Al Surface Calculated at the B3LYP/6-311+G(3df) Level of Theory, with Single Point Energies (Including Zero-Point Energy Correction) Calculated at UCCSD(T)/aug-cc-pVTZ**

|                                                               | <sup>2</sup> A   | TS <sup>2</sup> A/ <sup>2</sup> G | <sup>2</sup> G  | TS <sup>2</sup> A/ <sup>2</sup> H | TS <sup>2</sup> G/ <sup>2</sup> H | <sup>2</sup> H   | TS <sup>2</sup> H/ <sup>2</sup> E | <sup>2</sup> E              | TS <sup>2</sup> E/ <sup>2</sup> B | <sup>2</sup> B   |
|---------------------------------------------------------------|------------------|-----------------------------------|-----------------|-----------------------------------|-----------------------------------|------------------|-----------------------------------|-----------------------------|-----------------------------------|------------------|
| <b>State</b>                                                  | <sup>2</sup> A'' | <sup>2</sup> B <sub>2</sub>       | <sup>2</sup> A' | <sup>2</sup> A'                   | <sup>2</sup> A <sub>2</sub>       | <sup>2</sup> A'' | <sup>2</sup> A'                   | <sup>2</sup> B <sub>2</sub> | —                                 | <sup>2</sup> A'' |
| <b>Symmetry</b>                                               | C <sub>s</sub>   | C <sub>2v</sub>                   | C <sub>s</sub>  | C <sub>s</sub>                    | C <sub>2v</sub>                   | C <sub>s</sub>   | C <sub>s</sub>                    | C <sub>2v</sub>             | C <sub>∞v</sub>                   | C <sub>s</sub>   |
| <b>Energy (Hartree)</b>                                       | -355.86101       | -355.81649                        | -355.86550      | -355.85276                        | -355.84188                        | -355.85379       | -355.73423                        | -355.74974                  | -355.71962                        | -355.72342       |
| <b>Energy Relative to <sup>2</sup>A (kJ mol<sup>-1</sup>)</b> | 0                | 115.5                             | -12.1           | 21.8                              | 50.2                              | 18.8             | 333.0                             | 289.0                       | 371.1                             | 361.0            |
| <b>Dipole Moment (Debye)</b>                                  | 3.8556           | 3.2413                            | 1.0615          | 1.7848                            | 1.6006                            | 1.2148           | 4.7498                            | 3.4632                      | 5.0387                            | 2.4167           |
| <b>Bond Lengths (Å)</b>                                       |                  |                                   |                 |                                   |                                   |                  |                                   |                             |                                   |                  |
| C1C2                                                          | 1.317            | 1.342                             | 1.347           | 1.309                             | 1.316                             | 1.308            | 2.805                             |                             |                                   |                  |
| C2C3                                                          | 1.265            | 1.402                             | 1.347           | 1.303                             |                                   | 1.308            | 1.262                             | 1.267                       | 1.272                             | 1.243            |
| C3Al                                                          | 2.017            | 2.056                             | 2.141           | 2.194                             | 2.190                             | 2.327            | 1.878                             | 1.892                       | 1.788                             | 1.820            |
| C1C3                                                          |                  |                                   | 1.533           |                                   |                                   |                  |                                   |                             |                                   |                  |
| C1Al                                                          |                  | 3.355                             | 2.140           | 2.643                             |                                   | 2.327            | 1.963                             | 2.054                       | 1.012                             | 1.902            |
| C2Al                                                          |                  |                                   |                 | 2.347                             |                                   | 2.310            | 1.935                             | 1.892                       |                                   |                  |
| <b>Bond Angles (°)</b>                                        |                  |                                   |                 |                                   |                                   |                  |                                   |                             |                                   |                  |
| C1C2C3                                                        | 179.9            | 61.4                              | 69.4            | 154.7                             | 118.6                             | 148.6            | 112.6                             |                             |                                   |                  |
| C1C3C2                                                        |                  | 57.2                              | 55.3            |                                   |                                   |                  |                                   |                             |                                   |                  |
| C1C2Al                                                        |                  |                                   |                 | 87.8                              |                                   | 74.3             | 44.4                              |                             |                                   |                  |
| C1AlC2                                                        |                  |                                   |                 | 29.7                              |                                   | 32.8             | 92.0                              | 160.4                       |                                   |                  |
| C1C3Al                                                        |                  | 151.4                             | 69.0            |                                   |                                   |                  |                                   |                             |                                   |                  |
| C1AlC3                                                        |                  | 11.5                              | 42.0            | 62.8                              | 62.2                              | 65.5             | 130.7                             |                             | 180.0                             | 179.4            |
| C2C1C3                                                        |                  |                                   | 55.3            |                                   |                                   |                  |                                   |                             |                                   |                  |
| C2C1Al                                                        |                  | 78.5                              | 124.3           | 62.6                              | 89.6                              | 72.9             | 43.6                              |                             |                                   |                  |
| C2C3Al                                                        | 179.4            | 151.4                             | 124.3           | 79.9                              | 89.6                              | 72.9             | 73.2                              | 70.4                        | 180.0                             | 179.5            |
| C2AlC3                                                        |                  |                                   |                 | 33.1                              |                                   |                  | 38.6                              | 39.1                        |                                   |                  |
| C3C2Al                                                        |                  |                                   |                 |                                   |                                   | 74.3             | 68.2                              |                             |                                   |                  |
| <b>Dihedral Angles (°)</b>                                    |                  |                                   |                 |                                   |                                   |                  |                                   |                             |                                   |                  |
| AlC3C2C1                                                      | 0.0              | 180.0                             | 180.0           | 0.0                               | 0.0                               | 0.0              | 0.0                               | 0.0                         | —                                 | 0.0              |
| C1C2AlC3                                                      | 180.0            | 0.0                               | 0.0             | -180.0                            | 180.0                             | -180.0           | 180.0                             | 180.0                       | —                                 | 0.0              |

<sup>a</sup> The data in parentheses are calculated at CCSD(T)/aug-cc-pVDZ//B3LYP/6-31+G(d) level of theory.

**Table 6. Minima Structures on the Quartet C<sub>3</sub>Al Surface Calculated at the UB3LYP/6-311+G(3df) Level of Theory, with Single Point Energies (Including Zero-Point Energy Correction) Calculated at UCCSD(T)/aug-cc-pVTZ**

|                                                               | 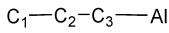 |  |  |  |  |  |  |
|---------------------------------------------------------------|-----------------------------------------------------------------------------------|-----------------------------------------------------------------------------------|-------------------------------------------------------------------------------------|-------------------------------------------------------------------------------------|-------------------------------------------------------------------------------------|-------------------------------------------------------------------------------------|-------------------------------------------------------------------------------------|
|                                                               | <sup>4</sup> A                                                                    | <sup>4</sup> C                                                                    | <sup>4</sup> G                                                                      | <sup>4</sup> F                                                                      | <sup>4</sup> H                                                                      | <sup>4</sup> E                                                                      | <sup>4</sup> B                                                                      |
| <b>State</b>                                                  | <sup>4</sup> Σ                                                                    | <sup>4</sup> A <sub>2</sub>                                                       | <sup>4</sup> A''                                                                    | <sup>4</sup> A''                                                                    | <sup>4</sup> A''                                                                    | <sup>4</sup> A <sub>2</sub>                                                         | <sup>4</sup> A''                                                                    |
| <b>Symmetry</b>                                               | C <sub>∞v</sub>                                                                   | C <sub>2v</sub>                                                                   | C <sub>s</sub>                                                                      | C <sub>s</sub>                                                                      | C <sub>s</sub>                                                                      | C <sub>2v</sub>                                                                     | C <sub>s</sub>                                                                      |
| <b>Energy (Hartree)</b>                                       | -355.81666<br>(-355.71434) <sup>a</sup>                                           | -355.77916<br>(-355.67690)                                                        | -355.79101<br>(-355.69359)                                                          | -355.78889<br>(-355.68203)                                                          | -355.82328<br>(-355.71459)                                                          | -355.77747<br>(-355.67386)                                                          | -355.74613<br>(-355.64647)                                                          |
| <b>Energy Relative to <sup>4</sup>A (kJ mol<sup>-1</sup>)</b> | 0                                                                                 | 98.3<br>(98.2)                                                                    | 62.8<br>(54.2)                                                                      | 72.8<br>(84.9)                                                                      | -17.6<br>(-0.8)                                                                     | 102.9<br>(106.2)                                                                    | 185.4<br>(178.1)                                                                    |
| <b>Dipole Moment (Debye)</b>                                  | 8.2012                                                                            | 3.6262                                                                            | 2.0958                                                                              | 3.9989                                                                              | 3.2751                                                                              | 3.5680                                                                              | 5.1272                                                                              |
| <b>Bond Lengths (Å)</b>                                       |                                                                                   |                                                                                   |                                                                                     |                                                                                     |                                                                                     |                                                                                     |                                                                                     |
| C1C2                                                          | 1.30173                                                                           | 1.324                                                                             | 1.358                                                                               | 1.361                                                                               | 1.322                                                                               |                                                                                     |                                                                                     |
| C2C3                                                          | 1.28410                                                                           | 1.415                                                                             | 1.358                                                                               | 1.361                                                                               | 1.322                                                                               | 1.265                                                                               | 1.256                                                                               |
| C3Al                                                          | 1.79564                                                                           | 1.919                                                                             | 1.951                                                                               | 1.926                                                                               | 1.992                                                                               | 1.886                                                                               | 1.785                                                                               |
| C1C3                                                          |                                                                                   | 1.415                                                                             | 1.490                                                                               |                                                                                     |                                                                                     |                                                                                     |                                                                                     |
| C1Al                                                          |                                                                                   |                                                                                   | 1.952                                                                               | 1.926                                                                               | 1.992                                                                               | 1.896                                                                               | 1.889                                                                               |
| C2Al                                                          |                                                                                   |                                                                                   |                                                                                     |                                                                                     | 1.980                                                                               | 1.886                                                                               |                                                                                     |
| <b>Bond Angles (°)</b>                                        |                                                                                   |                                                                                   |                                                                                     |                                                                                     |                                                                                     |                                                                                     |                                                                                     |
| C1C2C3                                                        | 180.0                                                                             | 62.1                                                                              | 66.6                                                                                | 85.3                                                                                | 142.1                                                                               |                                                                                     |                                                                                     |
| C1C3C2                                                        |                                                                                   | 55.8                                                                              | 56.7                                                                                |                                                                                     |                                                                                     |                                                                                     |                                                                                     |
| C1C2Al                                                        |                                                                                   |                                                                                   |                                                                                     |                                                                                     | 71.1                                                                                |                                                                                     |                                                                                     |
| C1AlC2                                                        |                                                                                   |                                                                                   |                                                                                     |                                                                                     | 38.9                                                                                | 160.4                                                                               |                                                                                     |
| C1C3Al                                                        |                                                                                   | 152.1                                                                             | 67.6                                                                                |                                                                                     |                                                                                     |                                                                                     |                                                                                     |
| C1AlC3                                                        |                                                                                   |                                                                                   | 44.9                                                                                | 57.2                                                                                | 77.8                                                                                |                                                                                     | 179.4                                                                               |
| C2C1C3                                                        |                                                                                   |                                                                                   | 56.7                                                                                |                                                                                     |                                                                                     |                                                                                     |                                                                                     |
| C2C1Al                                                        |                                                                                   |                                                                                   | 124.3                                                                               | 97.9                                                                                | 70.0                                                                                |                                                                                     |                                                                                     |
| C2C3Al                                                        | 180.0                                                                             |                                                                                   | 124.3                                                                               | 97.9                                                                                | 70.0                                                                                | 70.4                                                                                | 173.6                                                                               |
| C2AlC3                                                        |                                                                                   |                                                                                   |                                                                                     |                                                                                     | 38.9                                                                                | 39.2                                                                                |                                                                                     |
| C3C2Al                                                        |                                                                                   |                                                                                   |                                                                                     |                                                                                     | 71.1                                                                                |                                                                                     |                                                                                     |
| <b>Dihedral Angles (°)</b>                                    |                                                                                   |                                                                                   |                                                                                     |                                                                                     |                                                                                     |                                                                                     |                                                                                     |
| AlC3C2C1                                                      | —                                                                                 | 180.0                                                                             | 0.0                                                                                 | 38.4                                                                                | 0.0                                                                                 | 0.0                                                                                 | 0.0                                                                                 |
| C1C2AlC3                                                      | —                                                                                 | 0.0                                                                               | 180.0                                                                               | -125.6                                                                              | 180.0                                                                               | 180.0                                                                               | 180.0                                                                               |

<sup>a</sup> Energy data in parentheses are calculated at CCSD(T)/aug-cc-pVDZ//B3LYP/6-31+G(d) level of theory.

**Table 7. Transition Structures on the Quartet C<sub>3</sub>Al Surface Calculated at the UB3LYP/6-311+G(3df) Level of Theory, with Single Point Energies (Including Zero-Point Energy Correction) Calculated at UCCSD(T)/aug-cc-pVTZ**

|                                                               | TS <sup>4</sup> A/ <sup>4</sup> C       | TS <sup>4</sup> C/ <sup>4</sup> G | TS <sup>4</sup> A/ <sup>4</sup> H | TS <sup>4</sup> G/ <sup>4</sup> F | TS <sup>4</sup> F/ <sup>4</sup> H | TS <sup>4</sup> H/ <sup>4</sup> E | TS <sup>4</sup> E/ <sup>4</sup> B |
|---------------------------------------------------------------|-----------------------------------------|-----------------------------------|-----------------------------------|-----------------------------------|-----------------------------------|-----------------------------------|-----------------------------------|
| <b>State</b>                                                  | <sup>4</sup> A''                        | <sup>4</sup> A''                  | <sup>4</sup> A''                  | <sup>4</sup> A                    | <sup>4</sup> A                    | <sup>4</sup> A''                  | <sup>4</sup> A''                  |
| <b>Symmetry</b>                                               | C <sub>s</sub>                          | C <sub>s</sub>                    | C <sub>s</sub>                    | C <sub>1</sub>                    | C <sub>1</sub>                    | C <sub>s</sub>                    | C <sub>s</sub>                    |
| <b>Energy (Hartree)</b>                                       | -355.77642<br>(-355.67512) <sup>a</sup> | -355.77889<br>(-355.67562)        | -355.79972<br>(-355.69777)        | -355.78268<br>(-355.67604)        | -355.78163<br>(-355.67592)        | -355.71507<br>(-355.61276)        | -355.74490<br>(-355.64894)        |
| <b>Energy Relative to <sup>4</sup>A (kJ mol<sup>-1</sup>)</b> | 105.8<br>(102.8)                        | 99.1<br>(101.6)                   | 44.3<br>(43.5)                    | 89.0<br>(100.3)                   | 92.0<br>(100.7)                   | 266.3<br>(266.3)                  | 188.1<br>(171.4)                  |
| <b>Dipole Moment (Debye)</b>                                  | 5.4164                                  | 5.4211                            | 5.6806                            | 4.1200                            | 3.4073                            | 4.4521                            | 5.1752                            |
| <b>Bond Lengths (Å)</b>                                       |                                         |                                   |                                   |                                   |                                   |                                   |                                   |
| C1C2                                                          | 1.313                                   | 1.308                             | 1.309                             | 1.311                             | 1.303                             | 2.500                             | 1.258                             |
| C2C3                                                          | 1.342                                   | 1.913                             | 1.322                             | 1.412                             | 1.425                             | 1.277                             | 1.782                             |
| C3Al                                                          | 1.818                                   | 1.855                             | 1.844                             | 1.861                             | 1.900                             | 1.873                             |                                   |
| C1C3                                                          | 1.847                                   | 1.474                             |                                   |                                   |                                   |                                   |                                   |
| C1Al                                                          |                                         | 1.980                             | 3.350                             | 2.009                             | 2.021                             | 1.916                             | 1.889                             |
| C2Al                                                          |                                         |                                   | 2.397                             |                                   |                                   | 2.006                             | 2.958                             |
| <b>Bond Angles (°)</b>                                        |                                         |                                   |                                   |                                   |                                   |                                   |                                   |
| C1C2C3                                                        | 88.2                                    | 50.3                              | 176.607                           | 77.8                              | 106.8                             |                                   |                                   |
| C1C3C2                                                        | 45.3                                    | 43.0                              |                                   | 48.5                              |                                   |                                   |                                   |
| C1C2Al                                                        |                                         |                                   | 126.852                           |                                   | 61.9                              | 48.8                              |                                   |
| C1AlC2                                                        |                                         |                                   |                                   |                                   | 34.7                              | 79.2                              |                                   |
| C1C3Al                                                        | 134.4                                   | 72.0                              |                                   | 68.3                              |                                   |                                   |                                   |
| C1AlC3                                                        |                                         | 45.0                              |                                   | 52.4                              | 34.7                              |                                   | 179.8                             |
| C2C1C3                                                        | 46.6                                    | 86.7                              |                                   | 53.7                              |                                   |                                   |                                   |
| C2C1Al                                                        |                                         |                                   | 34.925                            | 111.7                             | 83.5                              | 52.0                              |                                   |
| C2C3Al                                                        |                                         |                                   | 97.074                            | 115.3                             | 85.1                              | 76.5                              | 152.8                             |
| C2AlC3                                                        |                                         |                                   | 33.171                            |                                   | 38.6                              | 38.3                              | 11.2                              |
| C3C2Al                                                        |                                         |                                   |                                   |                                   | 56.3                              | 65.2                              | 16.0                              |
| <b>Dihedral Angles (°)</b>                                    |                                         |                                   |                                   |                                   |                                   |                                   |                                   |
| AlC3C2C1                                                      | 180.0                                   | 0.0                               | 0.0                               | 15.1                              | 37.5                              | 0.0                               | 0.0                               |
| C1C2AlC3                                                      | 0.0                                     | 180.0                             | 180.0                             | -157.8                            | -138.6                            | 180.0                             | 180.0                             |

<sup>a</sup> Energy data in parentheses are calculated at CCSD(T)/aug-cc-pVDZ//B3LYP/6-31+G(d) level of theory.

**Table 8. Selected Minima Structures of Doublet and Quartet C<sub>3</sub>B Calculated Using UX3LYP and UBMK (in parentheses) Methods with cc-pVTZ Basis Set. Single Point Energies (Including Zero-Point Energy Correction) Calculated at UCCSD(T)/aug-cc-pVTZ**

|                                                           | 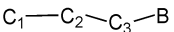 |  |  |  |  |  |
|-----------------------------------------------------------|-----------------------------------------------------------------------------------|------------------------------------------------------------------------------------|-------------------------------------------------------------------------------------|-------------------------------------------------------------------------------------|-------------------------------------------------------------------------------------|-------------------------------------------------------------------------------------|
|                                                           | <sup>2</sup> A                                                                    | <sup>4</sup> A                                                                     | <sup>2</sup> G                                                                      | <sup>4</sup> G                                                                      | <sup>2</sup> H                                                                      | <sup>4</sup> H                                                                      |
| State                                                     | <sup>2</sup> A''                                                                  | <sup>4</sup> Σ                                                                     | <sup>2</sup> A'                                                                     | <sup>4</sup> B <sub>1</sub>                                                         | <sup>2</sup> A'                                                                     | <sup>4</sup> A''                                                                    |
| Symmetry                                                  | C <sub>s</sub>                                                                    | C <sub>∞v</sub>                                                                    | C <sub>s</sub>                                                                      | C <sub>2v</sub>                                                                     | C <sub>2v</sub>                                                                     | C <sub>2v</sub>                                                                     |
| Energy (Hartree)                                          | -355.86080                                                                        | -355.81663                                                                         | -355.86546                                                                          | -355.78159                                                                          | -355.82519                                                                          | -355.82340                                                                          |
| Energy Relative to <sup>2</sup> G (kJ mol <sup>-1</sup> ) | (-355.86082)                                                                      | (-355.81632)                                                                       | (-355.86467)                                                                        | (-355.78208)                                                                        | (-355.78767)                                                                        | (-355.82365)                                                                        |
| Dipole Moment (Debye)                                     | +12.2 (+10.1) <sup>a</sup>                                                        | +128.2 (+126.9)                                                                    | 0 (0)                                                                               | +220.2 (+216.8)                                                                     | +117.7 (+116.5)                                                                     | +110.4 (+107.7)                                                                     |
| Bond Lengths (Å)                                          |                                                                                   |                                                                                    |                                                                                     |                                                                                     |                                                                                     |                                                                                     |
| C1C2                                                      | 1.317 (1.321)                                                                     | 1.301 (1.300)                                                                      | 1.435 (1.458)                                                                       | 1.374 (1.389)                                                                       | 1.361 (1.360)                                                                       | 1.355 (1.355)                                                                       |
| C2C3                                                      | 1.267 (1.261)                                                                     | 1.283 (1.284)                                                                      | 1.435 (1.460)                                                                       |                                                                                     |                                                                                     |                                                                                     |
| C3B                                                       | 1.506 (1.520)                                                                     | 1.380 (1.379)                                                                      | 1.482 (1.492)                                                                       | 1.501 (1.509)                                                                       | 1.576 (1.586)                                                                       | 1.519 (1.523)                                                                       |
| C1C3                                                      |                                                                                   |                                                                                    | 1.492 (1.545)                                                                       | 1.476 (1.525)                                                                       |                                                                                     |                                                                                     |
| C1B                                                       |                                                                                   |                                                                                    | 1.482 (1.491)                                                                       |                                                                                     |                                                                                     |                                                                                     |
| C2B                                                       |                                                                                   |                                                                                    |                                                                                     |                                                                                     | 1.519 (1.549)                                                                       | 1.590 (1.625)                                                                       |
| Bond Angles (°)                                           |                                                                                   |                                                                                    |                                                                                     |                                                                                     |                                                                                     |                                                                                     |
| C1C2C3                                                    | 174.5 (174.1)                                                                     | 180.0                                                                              | 62.6 (63.9)                                                                         | 64.9 (66.6)                                                                         |                                                                                     | 122.93961                                                                           |
| C1C3C2                                                    |                                                                                   |                                                                                    | 58.7 (58.0)                                                                         | 57.5 (56.7)                                                                         |                                                                                     |                                                                                     |
| C1C2B                                                     |                                                                                   |                                                                                    |                                                                                     |                                                                                     | 66.1 (65.7)                                                                         | 61.5 (60.7)                                                                         |
| C1BC2                                                     |                                                                                   |                                                                                    |                                                                                     |                                                                                     | 52.1 (51.4)                                                                         | 51.6 (50.9)                                                                         |
| C1C3B                                                     |                                                                                   |                                                                                    | 59.8 (58.8)                                                                         | 60.6 (59.6)                                                                         |                                                                                     |                                                                                     |
| C1BC3                                                     |                                                                                   |                                                                                    | 60.4 (62.4)                                                                         | 58.9 (60.7)                                                                         |                                                                                     |                                                                                     |
| C2C1C3                                                    |                                                                                   |                                                                                    | 58.7 (58.1)                                                                         |                                                                                     |                                                                                     |                                                                                     |
| C2C1B                                                     |                                                                                   |                                                                                    |                                                                                     |                                                                                     |                                                                                     |                                                                                     |
| C2C3B                                                     | 151.4 (156.4)                                                                     | 180.0                                                                              |                                                                                     |                                                                                     |                                                                                     |                                                                                     |
| C2BC3                                                     |                                                                                   |                                                                                    |                                                                                     |                                                                                     |                                                                                     |                                                                                     |
| C3C2B                                                     |                                                                                   |                                                                                    |                                                                                     |                                                                                     |                                                                                     |                                                                                     |
| Dihedral Angles (°)                                       |                                                                                   |                                                                                    |                                                                                     |                                                                                     |                                                                                     |                                                                                     |
| BC3C2C1                                                   | 180.0                                                                             | —                                                                                  | 0.0                                                                                 | 0.0                                                                                 | 0.0                                                                                 | 0.0                                                                                 |
| C1C2BC3                                                   | 180.0                                                                             | —                                                                                  | 180.0                                                                               | 180.0                                                                               | 180.0                                                                               | 180.0                                                                               |

<sup>a</sup> The relative energies shown in parentheses refer to the UCCSD(T)/aug-cc-pVTZ//UBMK/cc-pVTZ level of theory.

**Table 9. Selected Minima Structures of Doublet and Quartet C<sub>3</sub>Al Calculated Using UX3LYP and UBMK (in parentheses) Methods with cc-pVTZ Basis Set. Single Point Energies (Including Zero-Point Energy Correction) Calculated at UCCSD(T)/aug-cc-pVTZ**

|                                                               | 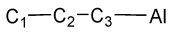 |  |  |  |  |  |
|---------------------------------------------------------------|-----------------------------------------------------------------------------------|------------------------------------------------------------------------------------|-------------------------------------------------------------------------------------|-------------------------------------------------------------------------------------|-------------------------------------------------------------------------------------|-------------------------------------------------------------------------------------|
|                                                               | <sup>2</sup> A                                                                    | <sup>4</sup> A                                                                     | <sup>2</sup> G                                                                      | <sup>4</sup> G                                                                      | <sup>2</sup> H                                                                      | <sup>4</sup> H                                                                      |
| <b>State</b>                                                  | <sup>2</sup> A' ( <sup>2</sup> A)                                                 | <sup>4</sup> Σ                                                                     | <sup>2</sup> A'                                                                     | <sup>4</sup> B <sub>1</sub> ( <sup>4</sup> A'')                                     | <sup>2</sup> B <sub>2</sub> ( <sup>2</sup> B <sub>1</sub> )                         | <sup>4</sup> A''                                                                    |
| <b>Symmetry</b>                                               | C <sub>∞v</sub>                                                                   | C <sub>∞v</sub>                                                                    | C <sub>s</sub>                                                                      | C <sub>2v</sub> (C <sub>s</sub> )                                                   | C <sub>2v</sub>                                                                     | C <sub>s</sub> (C <sub>2v</sub> )                                                   |
| <b>Energy (Hartree)</b>                                       | -138.53081                                                                        | -138.55005                                                                         | -138.56887                                                                          | -138.51861                                                                          | -138.55430                                                                          | -138.53818                                                                          |
|                                                               | (-138.53233)                                                                      | (-138.54997)                                                                       | (-138.57089)                                                                        | (-138.52072)                                                                        | (-138.55492)                                                                        | (-138.53840)                                                                        |
| <b>Energy Relative to <sup>2</sup>G (kJ mol<sup>-1</sup>)</b> | +99.9 (+101.2) <sup>a</sup>                                                       | +49.4 (+54.9)                                                                      | 0 (0)                                                                               | +132.0 (+131.7)                                                                     | +38.3 (+41.9)                                                                       | +80.6 (+85.3)                                                                       |
| <b>Dipole Moment (Debye)</b>                                  | 3.7527 (3.6932)                                                                   | 8.0248 (8.3278)                                                                    | 0.9845 (1.0238)                                                                     | 2.0212 (4.4468)                                                                     | 3.4060 (3.4231)                                                                     | 3.2172 (3.3155)                                                                     |
| <b>Bond Lengths (Å)</b>                                       |                                                                                   |                                                                                    |                                                                                     |                                                                                     |                                                                                     |                                                                                     |
| C1C2                                                          | 1.318 (1.322)                                                                     | 1.302 (1.303)                                                                      | 1.346 (1.351)                                                                       | 1.357 (1.362)                                                                       | 1.332 (1.340)                                                                       | 1.322 (1.331)                                                                       |
| C2C3                                                          | 1.264 (1.262)                                                                     | 1.284 (1.284)                                                                      | 1.346 (1.352)                                                                       | 1.357 (1.368)                                                                       |                                                                                     | 1.322 (1.331)                                                                       |
| C3Al                                                          | 2.020 (2.011)                                                                     | 1.799 (1.784)                                                                      | 2.147 (2.136)                                                                       | 1.960 (1.917)                                                                       | 2.013 (2.000)                                                                       | 2.000 (1.990)                                                                       |
| C1C3                                                          |                                                                                   |                                                                                    | 1.532 (1.618)                                                                       | 1.491 (1.798)                                                                       |                                                                                     |                                                                                     |
| C1Al                                                          |                                                                                   |                                                                                    | 2.147 (2.134)                                                                       | 1.960 (1.919)                                                                       |                                                                                     | 2.000 (1.990)                                                                       |
| C2Al                                                          |                                                                                   |                                                                                    |                                                                                     |                                                                                     | 1.974 (1.965)                                                                       | 1.986 (1.972)                                                                       |
| <b>Bond Angles (°)</b>                                        |                                                                                   |                                                                                    |                                                                                     |                                                                                     |                                                                                     |                                                                                     |
| C1C2C3                                                        | 180.0                                                                             | 180.0                                                                              | 69.3 (73.5)                                                                         | 66.7 (82.4)                                                                         |                                                                                     | 142.5 (142.2)                                                                       |
| C1C3C2                                                        |                                                                                   |                                                                                    | 55.3 (53.2)                                                                         | 56.7 (48.7)                                                                         |                                                                                     |                                                                                     |
| C1C2Al                                                        |                                                                                   |                                                                                    |                                                                                     |                                                                                     | 72.1 (71.7)                                                                         | 71.2 (71.1)                                                                         |
| C1AlC2                                                        |                                                                                   |                                                                                    |                                                                                     |                                                                                     | 39.0 (39.5)                                                                         | 38.7 (39.2)                                                                         |
| C1C3Al                                                        |                                                                                   |                                                                                    | 69.1 (67.6)                                                                         | 67.6 (62.1)                                                                         |                                                                                     |                                                                                     |
| C1AlC3                                                        |                                                                                   |                                                                                    | 41.8 (44.5)                                                                         | 44.7 (55.9)                                                                         |                                                                                     |                                                                                     |
| C2C1C3                                                        |                                                                                   |                                                                                    | 55.3 (53.3)                                                                         |                                                                                     |                                                                                     |                                                                                     |
| C2C1Al                                                        |                                                                                   |                                                                                    |                                                                                     |                                                                                     |                                                                                     | 70.0 (69.7)                                                                         |
| C2C3Al                                                        | 180.0                                                                             | 180.0                                                                              |                                                                                     |                                                                                     |                                                                                     | 70.0 (69.7)                                                                         |
| C2AlC3                                                        |                                                                                   |                                                                                    |                                                                                     |                                                                                     |                                                                                     | 38.7 (39.2)                                                                         |
| C3C2Al                                                        |                                                                                   |                                                                                    |                                                                                     |                                                                                     |                                                                                     |                                                                                     |
| <b>Dihedral Angles (°)</b>                                    |                                                                                   |                                                                                    |                                                                                     |                                                                                     |                                                                                     |                                                                                     |
| AlC3C2C1                                                      | —                                                                                 | —                                                                                  | 0.0                                                                                 | 0.0                                                                                 | 0.0                                                                                 | 0.0                                                                                 |
| C1C2AlC3                                                      | —                                                                                 | —                                                                                  | 180.0                                                                               | 180.0                                                                               | 180.0                                                                               | 180.0                                                                               |

<sup>a</sup> The relative energies shown in parentheses refer to the UCCSD(T)/aug-cc-pVTZ//UBMK/cc-pVTZ level of theory.



**Table 10. Standard enthalpies of formation [UCCSD(T)/aug-cc-pVTZ//UB3LYP/6-311+G(3df) level]<sup>a</sup>**

|                   | Structure      | $\Delta_f H^\circ$ (298K) | Structure      | $\Delta_f H^\circ$ (298K) |
|-------------------|----------------|---------------------------|----------------|---------------------------|
| C <sub>3</sub> B  | <sup>4</sup> A | 1120.5                    | <sup>2</sup> A | 1171.9                    |
|                   | <sup>4</sup> B | 1204.2                    | <sup>2</sup> B | 1212.9                    |
|                   | <sup>4</sup> D | 1202.9                    | <sup>2</sup> G | 1069.8                    |
|                   | <sup>4</sup> G | 1202.1                    | <sup>2</sup> H | 1108.3                    |
|                   | <sup>4</sup> H | 1149.8                    |                |                           |
| C <sub>3</sub> Al | <sup>2</sup> A | 909.2                     | <sup>4</sup> A | 1050.2                    |
|                   | <sup>2</sup> B | 1297.0                    | <sup>4</sup> B | 1237.6                    |
|                   | <sup>2</sup> E | 1226.7                    | <sup>4</sup> C | 1148.5                    |
|                   | <sup>2</sup> G | 894.5                     | <sup>4</sup> E | 1153.5                    |
|                   | <sup>2</sup> H | 954.0                     | <sup>4</sup> F | 1121.7                    |
|                   |                |                           | <sup>4</sup> G | 1117.1                    |
|                   |                |                           | <sup>4</sup> H | 1030.9                    |

<sup>a</sup> For a definition of structures, see Supplementary Table 3-7. Enthalpies of formation  $\Delta_f H^\circ$  (298K) in kJ mol<sup>-1</sup>.

**Table 11. Charge Distribution of selected C<sub>3</sub>B isomers [Mulliken charge<sup>1</sup> (given in normal print), NBO charge<sup>2</sup> (given in bold print), and AIM charge<sup>3</sup> (given in italics print) are shown in the table respectively].<sup>a</sup>**

|                                                                                                       | B            | C <sub>1</sub> | C <sub>2</sub> | C <sub>3</sub> |
|-------------------------------------------------------------------------------------------------------|--------------|----------------|----------------|----------------|
| 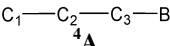<br><sup>4</sup> A   | 0.423        | -0.366         | 1.367          | -1.424         |
|                                                                                                       | <b>0.674</b> | <b>0.137</b>   | <b>-0.273</b>  | <b>-0.538</b>  |
|                                                                                                       | <i>1.137</i> | <i>0.123</i>   | <i>-0.296</i>  | <i>-1.011</i>  |
| <br><sup>4</sup> G  | 0.326        | -0.012         | -0.303         | -0.012         |
|                                                                                                       | <b>0.322</b> | <b>-0.163</b>  | <b>0.004</b>   | <b>-0.163</b>  |
|                                                                                                       | <i>1.194</i> | <i>0.068</i>   | <i>-0.705</i>  | <i>0.172</i>   |
| <br><sup>4</sup> H | 0.605        | -0.340         | 0.075          | -0.340         |
|                                                                                                       | <b>0.533</b> | <b>-0.183</b>  | <b>-0.166</b>  | <b>-0.184</b>  |
|                                                                                                       | <i>1.585</i> | <i>-0.862</i>  | <i>0.432</i>   | <i>-0.308</i>  |
| <br><sup>2</sup> A | 0.130        | -0.625         | 0.989          | -0.494         |
|                                                                                                       | <b>0.492</b> | <b>0.228</b>   | <b>-0.322</b>  | <b>-0.398</b>  |
|                                                                                                       | <i>0.824</i> | <i>0.172</i>   | <i>-0.261</i>  | <i>-0.739</i>  |
| <br><sup>2</sup> G | 0.521        | -0.079         | -0.363         | -0.079         |
|                                                                                                       | <b>0.609</b> | <b>-0.322</b>  | <b>0.034</b>   | <b>-0.322</b>  |
|                                                                                                       | <i>1.323</i> | <i>-0.720</i>  | <i>0.112</i>   | <i>-0.720</i>  |
| <br><sup>2</sup> H | 0.598        | -0.396         | 0.194          | -0.396         |
|                                                                                                       | <b>0.523</b> | <b>-0.109</b>  | <b>-0.304</b>  | <b>-0.110</b>  |
|                                                                                                       | <i>1.523</i> | <i>-0.961</i>  | <i>0.399</i>   | <i>-0.961</i>  |

<sup>a</sup> (1) R. S. Mulliken, *J. Chem. Phys.*, 1955, **23**, 1833-1840; I. G. Csizmadia, *Theory and Practice of MO Calculations on Organic Molecules*, Elsevier, Amsterdam, 1976; F.M. Bickelhaupt, N. J. R. van Eikema Hommes, C. Fonseca Guerra and E.J. Baerends. *Organometallics*, 1996, **15**, 2923-2931. (2) A. E. Reed, L. A. Curtiss, and F. Weinhold, *Chem. Rev.* 1988, **88**, 899-926; F. Weinhold and J. E. Carpenter, in, R. Naaman and Z. Vager (eds.), "The Structure of Small Molecules and Ions" (Plenum, New York, 1988), pp.227-236. J. M. Anglada and J. M. Bofill, *Theor. Chim. Acta.* 1995, **92**, 369-381. (3) R. F. W. Bader. *Atoms in Molecules: A Quantum Theory*; Clarendon Press, Oxford, 1990; R. Bader. *Atoms in Molecules: A Quantum Theory*, USA: Oxford University Press, 1994; R. Bader. *Chem. Rev.*, 1991, **91**, 893-928.

**Table 12. Charge Distribution of selected C<sub>3</sub>Al isomers [Mulliken charge (given in normal print), NBO charge (given in bold print), and AIM charge (given in italics print) are shown in the table respectively].**

|                                                                                                            | Al           | C <sub>1</sub> | C <sub>2</sub> | C <sub>3</sub> |
|------------------------------------------------------------------------------------------------------------|--------------|----------------|----------------|----------------|
| 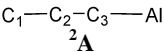<br><sup>2</sup> <b>A</b> | 0.196        | -0.592         | 0.645          | -0.249         |
|                                                                                                            | <b>0.753</b> | <b>0.170</b>   | <b>-0.461</b>  | <b>-0.462</b>  |
|                                                                                                            | <i>1.194</i> | <i>-1.197</i>  | <i>0.622</i>   | <i>-0.619</i>  |
| <br><sup>2</sup> <b>G</b> | 0.405        | -0.135         | -0.134         | -0.136         |
|                                                                                                            | <b>0.771</b> | <b>-0.366</b>  | <b>-0.366</b>  | <b>-0.039</b>  |
|                                                                                                            | <i>1.092</i> | <i>0.091</i>   | <i>-0.090</i>  | <i>0.412</i>   |
| <br><sup>2</sup> <b>H</b> | 0.489        | -0.436         | 0.383          | -0.436         |
|                                                                                                            | <b>0.757</b> | <b>-0.055</b>  | <b>-0.648</b>  | <b>-0.055</b>  |
|                                                                                                            | <i>0.849</i> | <i>-0.164</i>  | <i>-0.523</i>  | <i>-0.164</i>  |
| <br><sup>4</sup> <b>A</b> | 0.501        | -0.645         | 0.554          | -0.410         |
|                                                                                                            | <b>1.084</b> | <b>0.060</b>   | <b>-0.370</b>  | <b>-0.775</b>  |
|                                                                                                            | <i>1.232</i> | <i>0.053</i>   | <i>-0.323</i>  | <i>-0.966</i>  |
| <br><sup>4</sup> <b>G</b> | 0.359        | -0.112         | -0.136         | -0.112         |
|                                                                                                            | <b>0.780</b> | <b>-0.345</b>  | <b>-0.074</b>  | <b>-0.360</b>  |
|                                                                                                            | <i>1.349</i> | <i>0.111</i>   | <i>-0.235</i>  | <i>0.249</i>   |
| <br><sup>4</sup> <b>H</b> | 0.656        | -0.541         | 0.426          | -0.541         |
|                                                                                                            | <b>1.270</b> | <b>-0.412</b>  | <b>-0.442</b>  | <b>-0.416</b>  |
|                                                                                                            | <i>1.567</i> | <i>-0.390</i>  | <i>0.477</i>   | <i>0.001</i>   |

<sup>a</sup>Mulliken charge distribution calculations for this structure have been reported previously at MP2/6-311G\* and B3LYP/6-311G\* levels of theory.<sup>61</sup> These results are comparable to those listed in this Table.
